# Supplementary material for: Circulating Endocannabinoids as Diagnostic Markers of Canine Chronic Enteropathies: A Pilot Study
Source: PubMed Central journal article supplement (PMC8187750; doi:10.3389/fvets.2021.655311), 2021-05-26
Supplement: Data_Sheet_1.pdf [file Data_Sheet_1.pdf]

## *Supplementary Material*

### **Circulating Endocannabinoids as Diagnostic Markers of Canine Chronic Enteropathies: a Pilot Study**

**Elettra Febo<sup>1†</sup>, Paolo Emidio Crisi<sup>1†</sup>, Sergio Oddi<sup>1,2†</sup>, Marco Pietra<sup>3</sup>, Giorgia Galiazzo<sup>3</sup>, Fabiana Piscitelli<sup>4</sup>, Alessandro Gramenzi<sup>1</sup>, Roberta Di Prinzio<sup>1</sup>, Morena Di Tommaso<sup>1</sup>, Nicola Bernabò<sup>5,6</sup>, Tiziana Bisogno<sup>7\*</sup>, Mauro Maccarrone<sup>2,8\*</sup> and Andrea Boari<sup>1\*</sup>**

<sup>1</sup>Faculty of Veterinary Medicine, University of Teramo, 64100 Teramo, Italy

<sup>2</sup>European Center for Brain Research/Santa Lucia Foundation IRCCS, 00143 Rome, Italy

<sup>3</sup>Department of Veterinary Medical Sciences, *Alma Mater Studiorum*-University of Bologna, 40064 Ozzanodell'Emilia (BO), Italy

<sup>4</sup>Institute of Biomolecular Chemistry, National Research Council, 80078 Pozzuoli, Italy

<sup>5</sup>Faculty of Bioscience, and Technology for Food Agriculture and Environment, University of Teramo, 64100 Teramo, Italy

<sup>6</sup>Institute of Biochemistry and Cell Biology, National Research Council, 00133 Rome, Italy

<sup>7</sup>Institute of Translational Pharmacology, National Research Council, 00133 Rome, Italy

<sup>8</sup>Department of Biotechnological and Applied Clinical Sciences, University of L'Aquila, 67100 L'Aquila, Italy

<sup>†</sup>These authors have contributed equally to this work and share first authorship

**\* Correspondence:**

Corresponding Authors

tiziana.bisogno@ift.cnr.it; mauro.maccarrone@univaq.it; aboari@unite.it

**Supplementary Table 1.** Breed, sex, age and bodyweight of the healthy dogs (n=30) and plasmatic concentrations of circulating endocannabinoids recorded for each healthy dog. M: male; F: female; Mn: neutered male; Fs: spayed female; 2-AG: 2-arachidonoylglycerol; AEA: N-arachidonoyl ethanolamine; PEA: N-palmitoylethanolamine; OEA: N-oleoylethanolamine.

| Breed                    | Sex | Age (months) | Bodyweight (kg) | AEA (pmol/ml) | 2-AG (pmol/ml) | PEA (pmol/ml) | OEA (pmol/ml) |
|--------------------------|-----|--------------|-----------------|---------------|----------------|---------------|---------------|
| English Bulldog          | F   | 72           | 25              | 1.6           | 2.8            | 59.0          | 46.2          |
| Jack Russell Terrier     | Mn  | 78           | 7               | 2.4           | 2.2            | 65.9          | 47.2          |
| Golden Retriever         | M   | 6            | 23              | 1.7           | 1.6            | 34.2          | 52.4          |
| American Pitbull Terrier | F   | 6            | 12              | 1.1           | 2.3            | 25.6          | 31.8          |
| Golden Retriever         | F   | 60           | 30              | 1.5           | 3.2            | 17.3          | 25.2          |
| Mixed breed dog          | Fs  | 66           | 27              | 2.1           | 6.1            | 19.2          | 51.9          |
| English Bulldog          | F   | 48           | 20              | 1.5           | 6.8            | 27.3          | 77.5          |
| Mixed breed dog          | Fs  | 96           | 18              | 1.6           | 4.4            | 23.4          | 76.5          |
| Mixed breed dog          | Fs  | 60           | 20              | 1.5           | 5.3            | 30.7          | 111.8         |
| Dobermann Pinscher       | F   | 22           | 35              | 0.9           | 4.5            | 22.8          | 39.5          |
| Mixed breed dog          | F   | 42           | 5               | 2.1           | 3.0            | 31.1          | 56.2          |
| Jack Russell Terrier     | F   | 54           | 6               | 1.5           | 3.6            | 19.2          | 70.2          |
| Mixed breed dog          | Mn  | 60           | 17              | 2.5           | 6.6            | 19.5          | 67.0          |
| Jack Russell Terrier     | Fs  | 48           | 5               | 2.0           | 4.0            | 12.0          | 31.9          |
| Jack Russell Terrier     | Mn  | 9            | 8               | 1.7           | 4.1            | 17.5          | 49.5          |
| Golden Retriever         | M   | 70           | 36              | 2.0           | 6.4            | 26.4          | 78.5          |
| Beagle                   | M   | 72           | 16              | 1.3           | 4.3            | 17.5          | 64.1          |
| Bernese Mountain Dog     | Fs  | 24           | 35.5            | 2.1           | 4.6            | 23.4          | 46.6          |
| Mixed breed dog          | Fs  | 24           | 20              | 2.1           | 8.7            | 25.8          | 47.7          |
| English Setter           | Fs  | 102          | 21.7            | 2.4           | 2.5            | 30.5          | 121.1         |
| Corso dog                | M   | 60           | 59              | 2.6           | 2.7            | 22.6          | 54.0          |
| Alaskan Malamute         | M   | 24           | 24              | 1.8           | 3.0            | 31.6          | 66.9          |
| Rottweiler               | M   | 86           | 39.2            | 2.2           | 2.6            | 46.9          | 74.6          |
| Siberian Husky           | F   | 45           | 21              | 2.8           | 3.3            | 56.0          | 90.8          |
| Siberian Husky           | F   | 28           | 21.5            | 1.4           | 3.0            | 46.2          | 51.2          |
| Mixed breed dog          | M   | 12           | 5               | 2.8           | 2.4            | 57.1          | 82.9          |
| English Setter           | Fs  | 66           | 23              | 1.0           | 20.2           | 7.8           | 9.2           |
| Jack Russell Terrier     | F   | 24           | 5               | 1.3           | 24.8           | 11.4          | 26.7          |
| Belgian Shepherd Dog     | M   | 60           | 31              | 1.4           | 73.6           | 9.2           | 21.1          |
| Border Collie            | Fs  | 20           | 24              | 9.9           | 18.9           | 16.0          | 24.4          |

**Supplementary Table 2.** Comparison of sex, age and bodyweight between healthy dogs and dogs affected by chronic enteropathy (CE) (Mann-Whitney test or Fisher's exact test) and comparison of age and bodyweight among control group and dogs with Food-responsive Enteropathy (FRE), Antibiotic-

responsive Enteropathy (ARE) and Immunosuppressive-responsive enteropathy (IRE) (Kruskal–Wallis test and Dunn’s multiple comparison post-hoc test). *Italic denotes significance.*

| Comparison     | Age                        |         | Bodyweight                 |             | Sex                 |             |
|----------------|----------------------------|---------|----------------------------|-------------|---------------------|-------------|
|                | Test                       | p value | Test                       | p value     | Test                | p value     |
| Control vs CE  | Mann-Whitney               | 0.14    | Mann-Whitney               | 0.91        | Fisher's exact test | <i>0.01</i> |
| Control vs FRE |                            | 0.08    |                            | 0.22        |                     |             |
| Control vs ARE |                            | >0.99   |                            | > 0.99      |                     |             |
| Control vs IRE | Dunn’s multiple comparison | >0.99   | Dunn’s multiple comparison | 0.96        |                     |             |
| FRE vs ARE     |                            | 0.08    |                            | 0.17        |                     |             |
| FRE vs IRE     |                            | >0.99   |                            | <i>0.02</i> |                     |             |
| ARE vs IRE     |                            | 0.96    |                            | > 0.99      |                     |             |

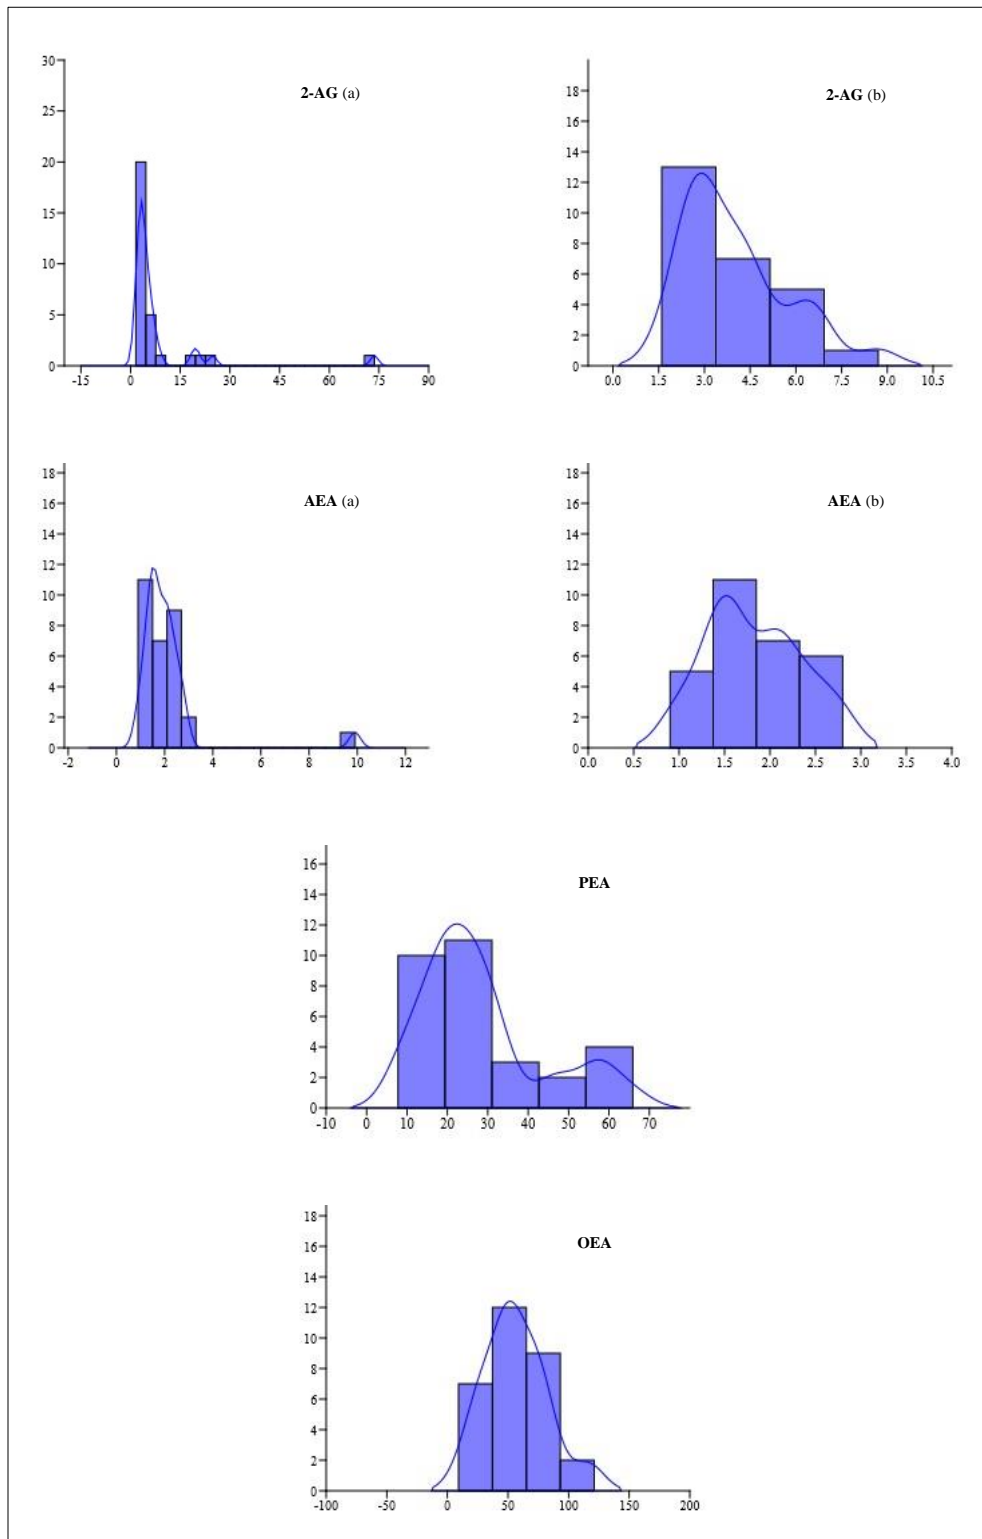

**Supplementary Figure 1.** Histograms of plasmatic concentrations of circulating 2-arachidonoylglycerol (2-AG) [including (a) or excluding (b) suspected outliers], N-

arachidonylethanolamine (AEA) [including (a) or excluding (b) suspected outliers], N-palmitoylethanolamine (PEA) and N-oleoylethanolamine (OEA).
